# Supplementary figures and images for: Generation of a mesoporous silica MSU shell onto solid core silica nanoparticles using a simple two-step sol–gel process
Source: Royal Society of Chemistry journal article supplement (doi:10.1039/c1cc12242h), 2011-01-01

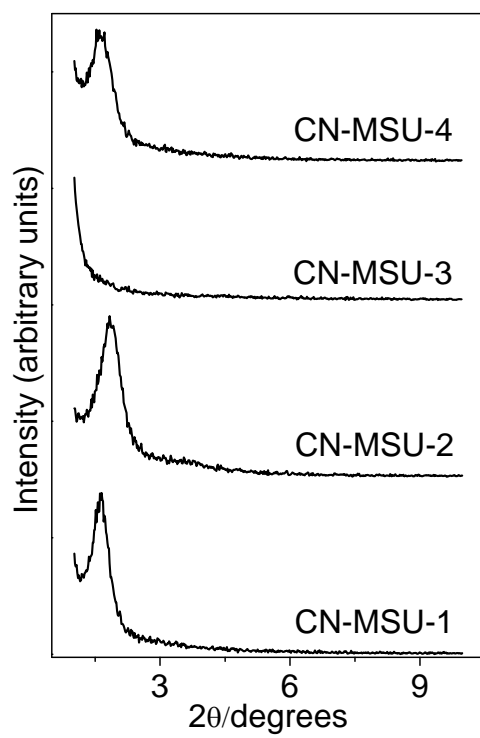

XRD diagrams of CN-MSU-X, X= 1 to 4.

Supplement: c1cc12242h.pdf [file c1cc12242h.pdf]
